# Supplementary material for: Rapid functional genetics of the oligodendrocyte lineage using pluripotent stem cells
Source: PubMed Central journal article supplement (PMC6137209; doi:10.1038/s41467-018-06102-7), 2018-09-13
Supplement: 41467_2018_6102_MOESM2_ESM.pdf [file 41467_2018_6102_MOESM2_ESM.pdf]

## **Description of Additional Supplementary Files**

File Name: Supplementary Data 1

Description: Gene expression profiles of in vitro derived OPCs and oligodendrocytes compared to in vivo oligodendrocyte lineage cells (Excel document).
